# Supplementary material for: Challenges for medical educators: Results of a survey among members of the German association for medical education
Source: PubMed Central journal article supplement — GMS Z Med Ausbild. 2013 Aug 15;30(3):Doc38. doi: 10.3205/zma000881 (PMC3778529; doi:10.3205/zma000881), 2013-08-15
Supplement: ZMA-30-38-s-001.pdf [file ZMA-30-38-s-001.pdf]

---

**Typical citations are indicated for each category.**

**1. Academic recognition for assignments in medical education is much too low compared to clinical work and biomedical research.**

---

*General disregard for teaching compared to clinical activities and science*

*In the evaluation of one's own achievement, research is evaluated much more highly than commitment to teaching*

*Low status of teaching at one's own institution, therefore deflagration of innovation and commitment*

*Teaching bad for career in contrast to research*

*Lack of consideration of teaching qualification when filling the Chair holder post*

*Misguiding of universities through imbalanced success criteria of work units*

*Low regard for teaching*

*Few career possibilities as a medical educator*

*Lack of recognition of teaching as an 'academic' activity*

*Lack of recognition of teaching as a decisive part of a medical faculty*

*Rather damaging for one's personal career*

*No equivalence to clinical research*

*Lack of recognition*

*Lacking, but at least unclear, recognition*

*Area of tension between patient care, teaching and research*

---

**2. Institutional support for medical education is too low and organisational structures are insufficient.**

---

*Lack of structures for quality assurance in teaching*

*Educators too tied to administrative tasks*

*Insufficient organisational support from Dean of Studies*

*Lack of space available for small-group teaching*

*Too little coordination in the curriculum, Chair holders are still 'little kings' who are able to block a curriculum reform*

*Imbalance in administrative resources (number of students-teachers-infrastructure)*

*No separate accounting for research and teaching*

*Lack of resources (rooms, equipment)*

*Lack of professional educational administration*

*Too few seminar rooms*

*Organisational independent staff management lies in health care provision*

*Student groups too large*

*Equipment*

*Too many students*

*Administrative hurdles*

*General conditions are in need of improvement*

*Increasing organisational overheads in education, lack of coordination between subjects*

*Lack of technological infrastructure (e.g. to conduct online assessments)*

*Lack of development and support of a team for curriculum development*

*Professional structure in Dean of Studies*

---

**3. Financial support (funding) for medical education is insufficient**

---

*Too little equipment of education with resources, still in third place behind research and health care provision*

*No resources (rooms, personnel, funds)*

*Federal state does not possess financial capacities to fund the universities in the area "Projects on education"*

*Lack of readiness to invest, lack of resources*

---

---

*Too few financial incentives for good didacticians*

*Lack of financing opportunities*

*Funding cuts*

*Lack of designation of own resources for teaching*

*Much too low funding*

*Shortage of funds*

*Financing of the development and implementation of new concepts*

---

#### **4. Curricula in need of reform, e.g. due to insufficient interlinkage**

---

*Lack of real interdisciplinary approach*

*Lack of readiness to network contents*

*More integration between pre-clinical subjects (curriculum-based) necessary*

*Rigid curricula*

---

#### **5. Insufficient time given to medical education**

---

*No 'release' for teaching (e.g. buzzer is still on and causes distraction)*

*Lack of 'main time period' (teaching always takes place in a hurry between clinical activity, e.g. no direct preparation time is bestowed in the organisational framework)*

*Insufficient amount of time for teaching*

*No time for teaching due to clinical overkill*

*Lack of time scope for teaching*

*Lack of time*

*Clinical overload*

---

#### **6. Educators have insufficient competence in teaching methodology (incl. use of new media) and too little interest in teaching activity**

---

*Medical lecturers have no didactic training*

*Lecturers are largely untrained*

*Lack of didactic, methodological competence of the educators*

*Lack of self-critical attitude of the educators*

*Too little interest of the professors and lecturers in teaching*

*Lack of interest of many educators*

*Lack of professionalism of the educators*

*Lack of knowledge in using the latest media and aids*

*Lack of computer literacy*

*Low level of awareness of E-learning*

*Lack of interest in teaching methodology in experienced clinicians*

*Sticking to old methods*

*Own didactic shortcomings*

*Insufficient knowledge regarding E-learning*

*'Attitudes' towards teaching, learning and assessing*

*PC-assisted learning techniques*

*Insufficient qualification of the educators*

*Colleagues not interested enough in medical education*

---

#### **7. There is a need for more faculty development**

---

*Faculty development through personnel development and training*

*Lack of training for the new generation*

*Lack of didactic training for the educators in the clinic*

*Too little practice-oriented further education training on site*

*Too few train-the-trainer courses*

---

#### **8. There is a need for networking within the institution**

---

*Lack of communication and 'networking' within the faculty*

*No network among the educators*

---

---

*Insufficient readiness for cooperation of other subject areas  
Communication and information within the clinic about teaching and processes still patchy.*

*Too little communication/too few arrangements with colleagues*

*Lack of communication between subjects*

*Networking among educators*

*Exchange with colleagues barely possible*

---

### **9. There is a shortage of educators**

---

*Personnel positions for good teaching are lacking*

*Too few personnel for teaching*

*Too few tutors*

*Shortage of personnel particularly in permanent positions*

---

### **10. Students have different preconditions**

---

*Students very heterogeneous regarding basic knowledge*

*Inhomogeneous interest of the students and contact with students too limited*

*Ambiguity about the students' prior knowledge*

*Unclear preconditions of the students*

*Unmotivated students*

---

### **11. Research in the area of medical education is insufficiently recognised, under-financed and is insufficiently imparted**

---

*Undervaluation of educational research*

*Insufficient funding for research in medical education*

*Lack of courses on research methodology in teaching*

*Insufficient recognition of educational research as a research area*

*Insufficient time for medical educational research*

*Insufficient supervision/mentoring in educational research*

*Too little recognition in the faculty for medical educational research*

---

### **12. Conducting assessments is laborious**

---

*Exam load*

*Marking written assessments*

*Complaints regarding assessments*

---

### **13. There is a lack of role models in medical education**

---

*Lack of successful role models from the area of medical education/educational research*

*Disinterest of the superiors/the medical director in medical education*

*No interest of persons in positions of responsibility*

---
